# Supplementary material for: Fetal Therapy Model of Myelomeningocele with Three-Dimensional Skin Using Amniotic Fluid Cell-Derived Induced Pluripotent Stem Cells
Source: PubMed Central journal article supplement (PMC5470234; doi:10.1016/j.stemcr.2017.05.013), 2017-06-09
Supplement: mmc1.pdf [file mmc1.pdf]

**Stem Cell Reports, Volume 8**

**Supplemental Information**

**Fetal Therapy Model of Myelomeningocele with Three-Dimensional  
Skin Using Amniotic Fluid Cell-Derived Induced Pluripotent Stem Cells**

**Kazuhiro Kajiwara, Tomohiro Tanemoto, Seiji Wada, Jurii Karibe, Norimasa Ihara, Yu  
Ikemoto, Tomoyuki Kawasaki, Yoshie Oishi, Osamu Samura, Kohji Okamura, Shuji  
Takada, Hidenori Akutsu, Haruhiko Sago, Aikou Okamoto, and Akihiro Umezawa**

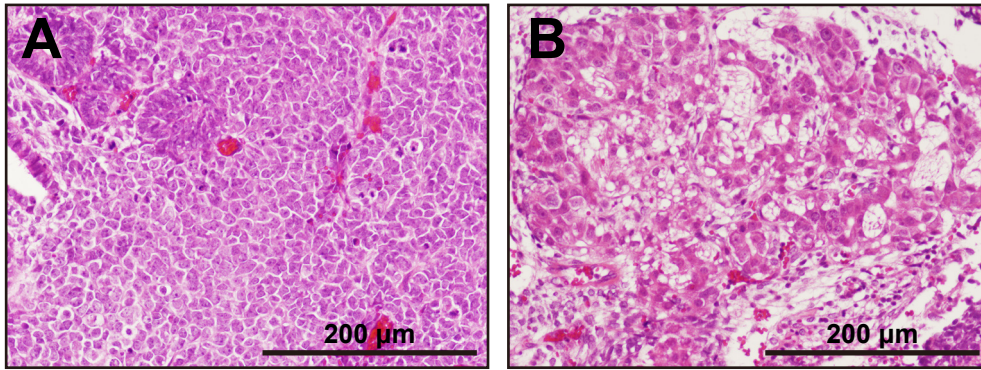

**C**

| Locus   | AF-T21-iPSCs |    |    | T21-AFC |    |    | AF-TTTS-iPSCs |    |  | TTTS-AFC |    |
|---------|--------------|----|----|---------|----|----|---------------|----|--|----------|----|
| D3S1358 | 15           | 16 |    | 15      | 16 |    | 15            | 16 |  | 15       | 16 |
| TH01    | 6            | 7  |    | 6       | 7  |    | 6             | 7  |  | 6        | 7  |
| D21S11  | 30           | 31 | 32 | 30      | 31 | 32 | 30            |    |  | 30       |    |
| D18S51  | 13           | 15 |    | 13      | 15 |    | 13            | 15 |  | 13       | 15 |
| Penta_E | 12           | 19 |    | 12      | 19 |    | 18            |    |  | 18       |    |
| D5S818  | 12           |    |    | 12      |    |    | 10            | 12 |  | 10       | 12 |
| D13S317 | 11           | 12 |    | 11      | 12 |    | 8             | 12 |  | 8        | 12 |
| D7S820  | 10           | 12 |    | 10      | 12 |    | 11            |    |  | 11       |    |
| D16S539 | 9            | 11 |    | 9       | 11 |    | 9             | 11 |  | 9        | 11 |
| CSF1PO  | 10           |    |    | 10      |    |    | 10            | 13 |  | 10       | 13 |
| Penta_D | 9            | 10 | 11 | 9       | 10 | 11 | 9             | 13 |  | 9        | 13 |
| AMEL    | X            |    |    | X       |    |    | X             |    |  | X        |    |
| vWA     | 14           | 19 |    | 14      | 19 |    | 14            | 17 |  | 14       | 17 |
| D8S1179 | 12           | 13 |    | 12      | 13 |    | 10            | 12 |  | 10       | 12 |
| TPOX    | 10           | 12 |    | 10      | 12 |    | 8             | 9  |  | 8        | 9  |
| FGA     | 22           |    |    | 22      |    |    | OL            | 21 |  | OL       | 21 |

**Supplemental Figure S1. Teratoma formation of in amniotic fluid cells from patients with Down syndrome (AF-T21-iPSC) in vivo. Related to Figure 2.**

(A) Neuroblastoma-like tissue. (B) Liver tissue with vacuolar structure. (C) STR analysis of AF-T21-iPSC, T21-AFC, AF-TTTS-iPSC, and TTTS-AFC. Short tandem repeat (STR) profiling was performed by BEX CO., LTD, Tokyo, Japan. The 16 loci analyzed by the PowerPlex 1.2 system (Promega, Madison, WI, USA) was composed of D3S1358, TH01, D21S11, D18S51, Penta E, D5S818, D13S317, D7S820, D16S539, CSF1PO, Penta D, AMEL, vWA, D8S1179, TPOX, and FGA. T21-AFC and TTTS-AFC were parental cells of AF-T21-iPSC and AF-TTTS-iPSC, respectively.

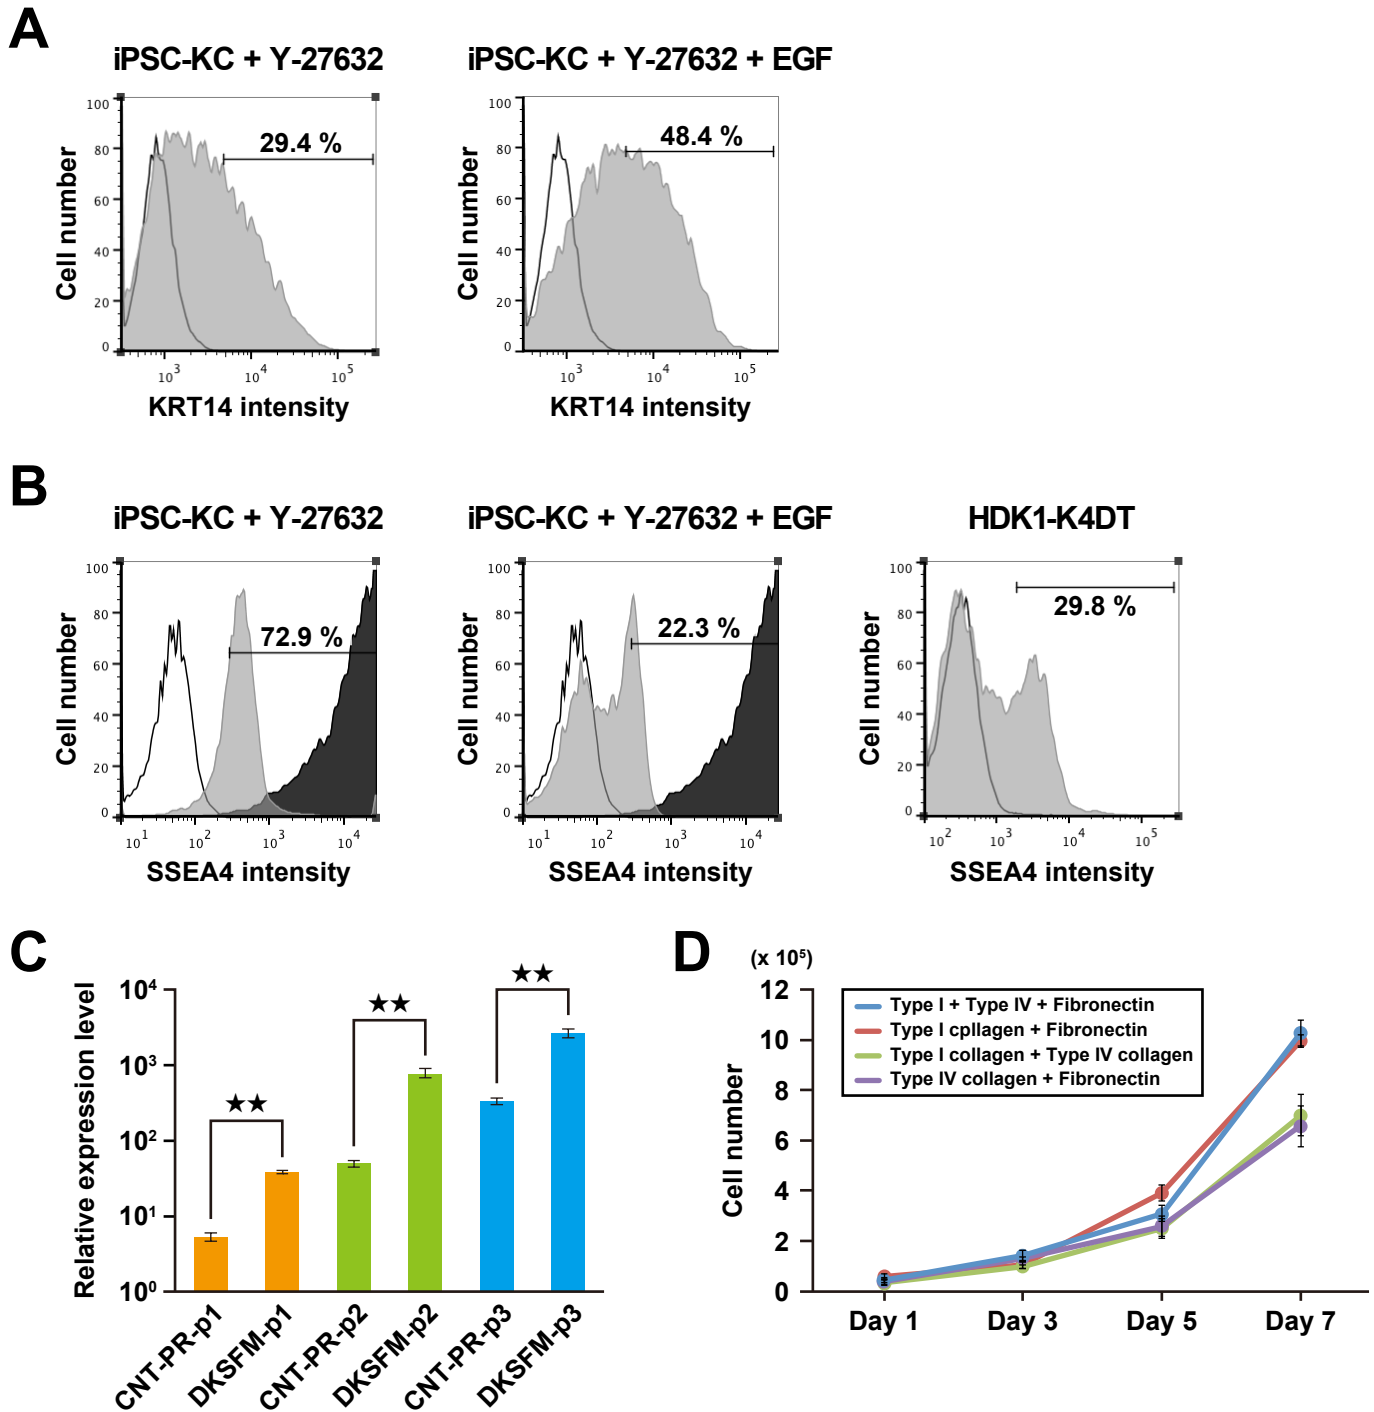

**Supplemental Figure S2. Establishment of differentiation protocol of iPSCs into the lineage of keratinocytes. Related to Figure 3.**

**(A)** Flow cytometric analysis of KRT14 in iPSC-KCs at passage 2 (gray) and at passage 0 (open). iPSC-KCs were exposed to Y-27632 and EGF. **(B)** Flow cytometric analysis of SSEA4 in T21-iPSC-KCs. T21-iPSC-KCs at passage 1 were exposed to Y27632 alone or Y27632 and EGF for 1 week and then applied to the flow cytometric analysis. Undifferentiated AF-T21-iPSCs were also shown in black for reference. The SSEA4 reactivity of HDK1-K4DT is displayed for reference. Isotype control is included at each panel. **(C)** qRT-PCR analysis of the *KRT14* transcripts in iPSC-KCs maintained either in a medium of DKFSM or CNT-PR with EGF and Y27632. The *KRT14* gene expression level was higher with the use of DKFSM than with the use of CNT-PR medium. Data are presented as a mean  $\pm$  SD of three independent experiments. **(D)** Comparison of the cell proliferation of iPSC-KCs on the matrix combinations with type I collagen, type IV collagen, and fibronectin. The combination of “type I collagen and fibronectin” was suitable for the cell proliferation of iPSC-KCs. Values are shown as mean  $\pm$  standard deviation from three independent experiments.

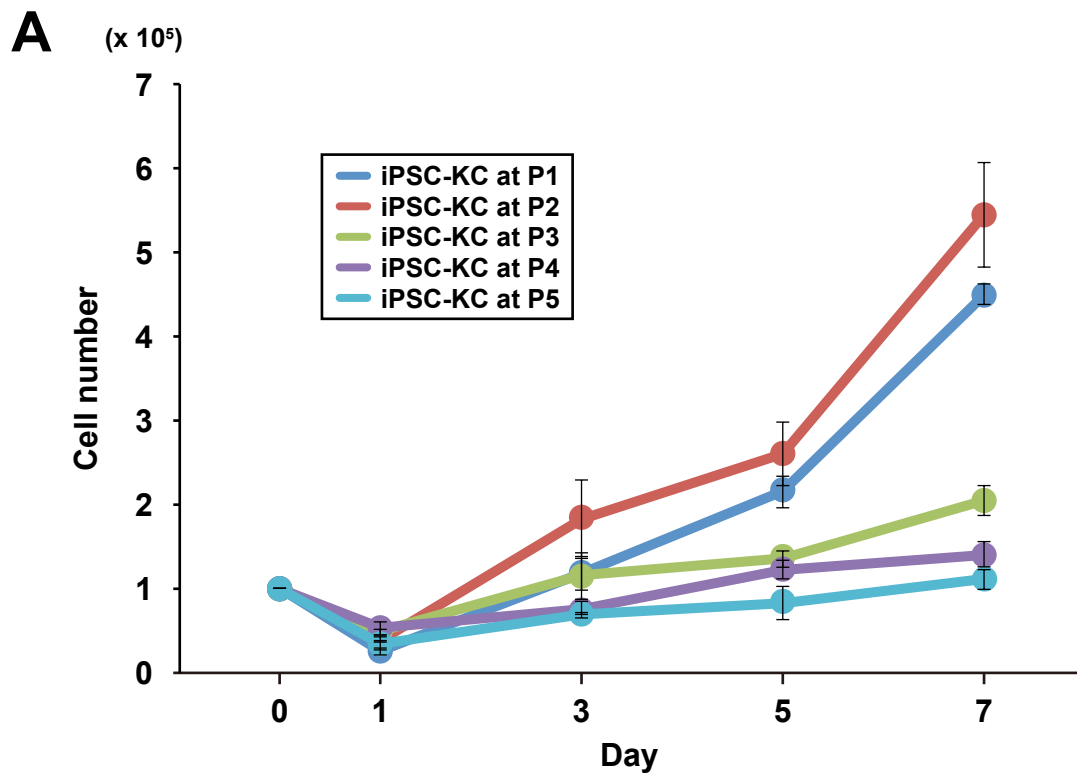

**B**

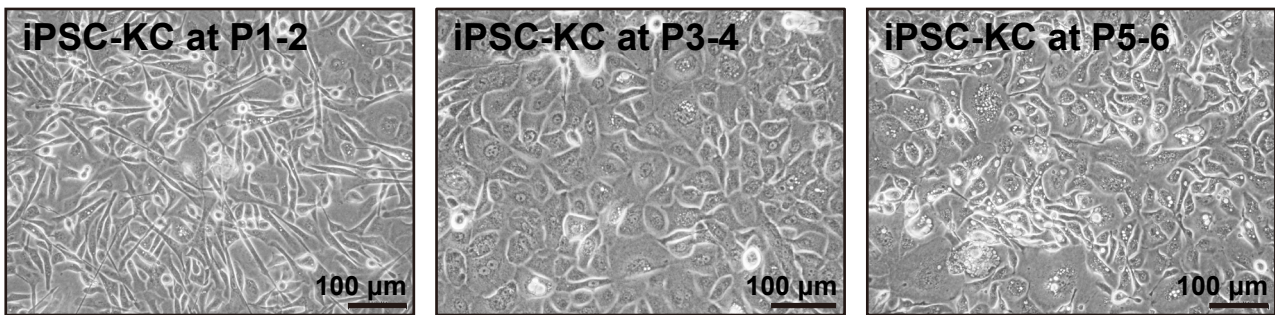

**Supplemental Figure S3: Characterization of T21-iPSC-KCs at different passage number. Related to Figure 4.** (A) The growth rate of T21-iPSC-KCs with the different passage number. Growth rate was reduced as each passage progressed. The initial cell number was  $1 \times 10^5$ /well, and the cell number was counted at the indicated days after cell seeding. Values are shown as mean  $\pm$  standard deviation from three independent experiments. (B) Cell morphology of T21-iPSC-KCs in different passage numbers. iPSC-KCs at early passage exhibited spindle cell morphology (iPSC-KC at P1-2) and became keratinocytic (iPSC-KC at P3-4). In later passages, keratinocyte-like cells with a vacuolar degeneration (iPSC-KC at P5-6) were observed. Image of “iPSC-KC at passage 3-4” is identical to “T21-iPSC-KC” in Figure 4A.

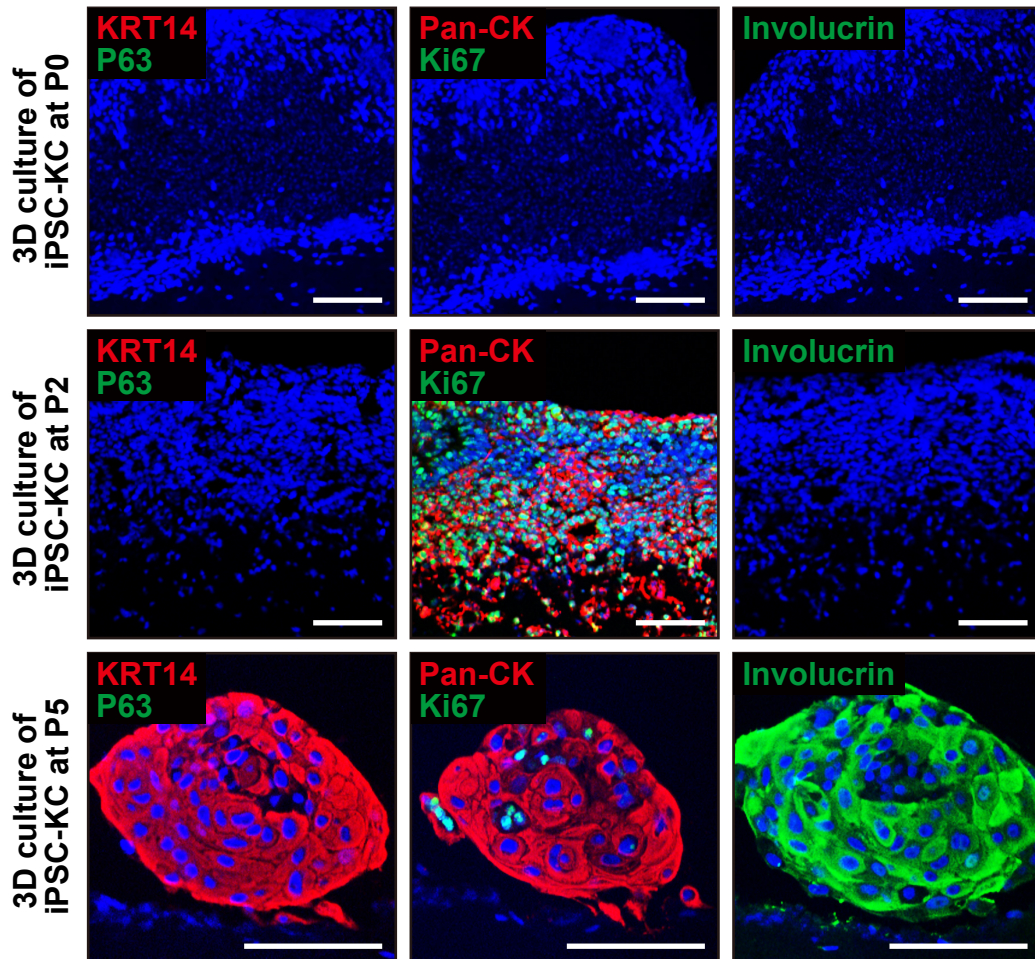

**Supplemental Figure S4. Immunohistochemical analysis on three-dimensional (3D) culture of iPSC-KCs at different passages. Related to Figure 4.**

iPSC-KCs at passage 0 were negative for KRT14, p63, pan-cytokeratin (Pan-CK), and Ki67. iPSC-KCs at passage 1 became positive for Pan-CK and Ki67 but not for KRT14 and p63. iPSC-KCs at passage 5 were positive for KRT14, Pan-CK, and involucrin but not for p63, indicating terminal differentiation of epidermis in the 3D-culture.

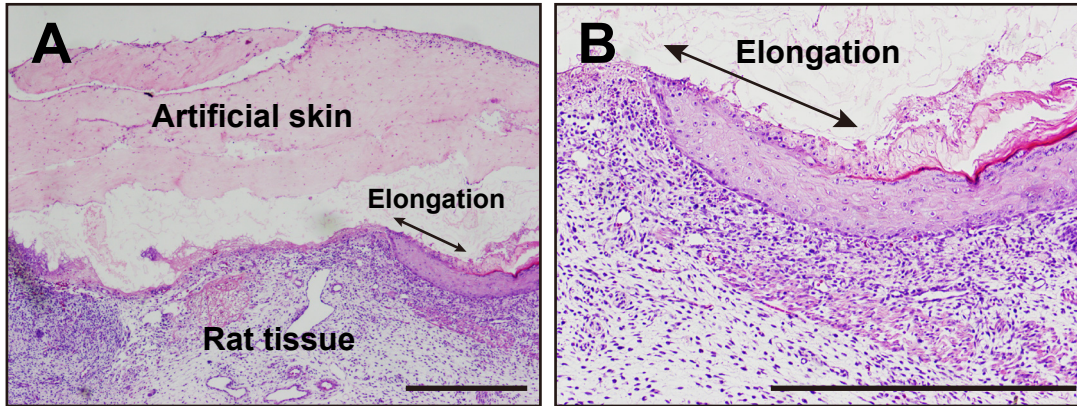

**Supplemental Figure S5. Short-term in vivo effect on the regeneration of rat skin defect with iPSC-KC artificial skin. Related to Figure 5.**

Epidermal ingrowth from the edge of the MMC defect was observed underneath the artificial skin under low magnification (**A**) and high magnification (**B**). Scale bar is 500  $\mu\text{m}$ .

Supplemental Table S1. List of primers used in this study

| Gene              | Primer sequence                   | Aim     |
|-------------------|-----------------------------------|---------|
| <i>OCT3/4</i>     | Forward TGTACTCCTCGGTCCCTTTC      | qRT-PCR |
|                   | Reverse TCCAGGTTTTCTTTCCCTAGC     |         |
| <i>NANOG</i>      | Forward CAGTCTGGACACTGGCTGAA      | qRT-PCR |
|                   | Reverse CTCGCTGATTAGGCTCCAAC      |         |
| <i>SOX2</i>       | Forward ATGGGTTCGGTGGTCAAGT       | qRT-PCR |
|                   | Reverse GGAGGAAGAGGTAACCACAG      |         |
| <i>TERT</i>       | Forward GGAGCAAGTTGCAAAGCATTG     | qRT-PCR |
|                   | Reverse TCCCACGACGTAGTCCATGTT     |         |
| <i>DNMT3B</i>     | Forward GGAAATTAGAATCAAGGAAATACGA | qRT-PCR |
|                   | Reverse AATTTGTCTTGAGGCGCTTGCC    |         |
| <i>KRT14</i>      | Forward GACCATTGAGGACCTGAGGA      | qRT-PCR |
|                   | Reverse CATACTTGGTGC GGAAGTCA     |         |
| <i>KRT18</i>      | Forward GAGTATGAGGCCCTGCTGAACATCA | qRT-PCR |
|                   | Reverse GCGGGTGGTGGTCTTTTGGAT     |         |
| <i>ΔNp63</i>      | Forward GGAAAACAATGCCCAGACTC      | qRT-PCR |
|                   | Reverse GTGGAATACGTCCAGGTGGC      |         |
| <i>INVOLUCRIN</i> | Forward GGAGAAAACACAAAGGGATCAG    | qRT-PCR |
|                   | Reverse TCCAACAGTTGCTCTTTCTTCA    |         |
| <i>FILAGGRIN</i>  | Forward TTCGGCAAATCCTGAAGAATC     | qRT-PCR |
|                   | Reverse CTTGAGCCAACCTGAATACCATC   |         |
| <i>GAPDH</i>      | Forward TGTTGCCATCAATGACCCCTT     | qRT-PCR |
|                   | Reverse CTCCACGACGTACTCAGCG       |         |

Supplemental Table S2. List of antibodies used in this study

|                                                                          | Class             | Company                  | Dilution        |
|--------------------------------------------------------------------------|-------------------|--------------------------|-----------------|
| Primary antibodies                                                       |                   |                          |                 |
| Mouse anti-human OCT3/4                                                  | Mouse IgG2b       | Santa cruz biotechnology | 1/300           |
| Anti-human NANOG                                                         | rabbit polyclonal | ReproCELL                | 1/200           |
| Rabbit anti-human SOX2                                                   | rabbit polyclonal | Millipore                | 1/300           |
| Mouse anti-SSEA-4                                                        | Mouse IgG3        | Millipore                | 1/300           |
| Anti-TRA-1-60                                                            | Mouse IgM         | Millipore                | 1/300           |
| Anti-TRA-1-81                                                            | Mouse IgM         | Millipore                | 1/300           |
| $\alpha$ SMA                                                             | Mouse IgG2a       | Sigma-Aldrich            | 1/400           |
| AFP                                                                      | Mouse IgG1        | R&D systems              | 1/100           |
| Neuron-specific class III beta-tubulin (TUJ-1)                           | Mouse IgG1        | Promega                  | 1/300           |
| Keratin 14 polyclonal antibody                                           | rabbit polyclonal | BioLegend                | 1/1000          |
| Anti-P63 (4A4) antibody                                                  | Mouse IgG2a       | Abcam                    | 1/50            |
| Anti laminin 5 antibody                                                  | rabbit polyclonal | Abcam                    | 1/200           |
| Keratin 10 polyclonal antibody                                           | rabbit polyclonal | BioLegend                | 1/1000          |
| Monoclonal Anti-Involucrin antibody produced in mouse                    | Mouse IgG         | Sigma-Aldrich            | 1/200           |
| Keratin 15 polyclonal antibody                                           | rabbit polyclonal | BioLegend                | 1/1000          |
| Anti-Ki67 antibody                                                       | rabbit polyclonal | abcam                    | 1/100           |
| Anti-Pan-cytokeratin antibody                                            | Mouse IgG1        | eBioscience              | 1/200           |
| Loricrin polyclonal antibody                                             | rabbit polyclonal | BioLegend                | 1/1000          |
| Anti-filaggrin antibody                                                  | Mouse IgG1        | abcam                    | 1/50            |
| Stem121, Mouse Monoclonal Antibody Specific for Human Cytoplasmic Marker | Mouse IgG1        | TaKaRa                   | 1/1000          |
| PE Mouse Anti-Human CD14                                                 | None              | BD Bioscience            | 20 $\mu$ l/test |



|                                                                     |      |                 |            |
|---------------------------------------------------------------------|------|-----------------|------------|
| FITC Mouse Anti-Human CD19                                          | None | BD Bioscience   | 20 µl/test |
| CD29-FITC                                                           | None | Beckman Coulter | 20 µl/test |
| CD31-FITC                                                           | None | Beckman Coulter | 20 µl/test |
| CD34-PE                                                             | None | Beckman Coulter | 20 µl/test |
| CD44-FITC                                                           | None | Beckman Coulter | 20 µl/test |
| PE Mouse Anti-Human CD73                                            | None | BD Bioscience   | 20 µl/test |
| CD105-PE                                                            | None | Beckman Coulter | 20 µl/test |
| FITC Mouse Anti-Human HLA-DR                                        | None | BD Bioscience   | 20 µl/test |
| FITC Mouse Anti-Human HLA-ABC                                       | None | BD Bioscience   | 20 µl/test |
| FITC Mouse IgG2a, κ Isotype Control                                 | None | BD Bioscience   | 20 µl/test |
| PE Mouse IgG1, κ Isotype Control                                    | None | BD Bioscience   | 20 µl/test |
| Mouse IgG1 (isotype control)-FITC                                   | None | Beckman Coulter | 20 µl/test |
| Secondary antibodies                                                |      |                 |            |
| Goat anti-Mouse IgG1 Secondary Antibody, Alexa Fluor® 488           | None | Invitrogen      | 1/1000     |
| Goat anti-Mouse IgG1 Secondary Antibody, Alexa Fluor® 546           | None | Invitrogen      | 1/1000     |
| Goat anti-Mouse IgG2a Secondary Antibody, Alexa Fluor® 488          | None | Invitrogen      | 1/1000     |
| Goat anti-Mouse IgG2a Secondary Antibody, Alexa Fluor® 546          | None | Invitrogen      | 1/1000     |
| Goat anti-Mouse IgG2b Secondary Antibody, Alexa Fluor 568           | None | Invitrogen      | 1/1000     |
| Goat anti-Mouse IgG3 Secondary Antibody, Alexa Fluor 488            | None | Invitrogen      | 1/1000     |
| Goat anti-Mouse IgM Heavy Chain Secondary Antibody, Alexa Fluor 488 | None | Invitrogen      | 1/1000     |
| Goat anti-Mouse IgG (H+L) Secondary Antibody, Alexa Fluor® 546      | None | Invitrogen      | 1/1000     |
| Goat anti-Chicken IgG (H+L) Secondary Antibody, Alexa Fluor® 488    | None | Invitrogen      | 1/1000     |
| Rabbit IgG (H+L) Polyclonal Secondary Antibody for IF, Flow         | None | Invitrogen      | 1/1000     |
| Rabbit IgG (H+L) Polyclonal Secondary Antibody for IF, ICC, Flow    | None | Invitrogen      | 1/1000     |
